# Supplementary material
Source: HighWire-hosted journal article supplement (https://drc.bmj.com/content/10/5/e003040)
Supplement: inline-supplementary-material-1 [file inline-supplementary-material-1.pdf]

| Language         | Keywords                                                                                                                                                                                                                                                                  | Countriescovered                                                                                                                                                                                                                                                   |
|------------------|---------------------------------------------------------------------------------------------------------------------------------------------------------------------------------------------------------------------------------------------------------------------------|--------------------------------------------------------------------------------------------------------------------------------------------------------------------------------------------------------------------------------------------------------------------|
| <b>Afrikaans</b> | insulien, #insulien, suikersiekte, #suikersiekte, diabeet, #diabeet, Bloedglukose, #bloedglucose                                                                                                                                                                          | South Africa, Namibia                                                                                                                                                                                                                                              |
| <b>Amharic</b>   | ኢንሱሊን, #ኢንሱሊን, የስኳር ህመም, #የስኳር, የስኳር ህመም, #የስኳር በሽታ, የደም ግሉኮስ, #የግሉኮስ                                                                                                                                                                                                     | Ethiopia                                                                                                                                                                                                                                                           |
| <b>Arabic</b>    | لأنسولين, #لأنسولين, داء السكري, #داء السكري, مريض بالسكر, #مريض بالسكر, جلوكوز الدم, يكافح السكري, مرض السكر النوع 1, مرض السكر النوع 2                                                                                                                                  | Algeria, Bahrain, Chad, The Comoros, Djibouti, Egypt, Eritrea, Iraq, Jordan, Kuwait, Lebanon, Libya, Mauritania, Morocco, Oman, Palestine, Qatar, Saudi Arabia, Somalia, Sudan, Syria, Tanzania, Tunisia, United Arab Emirates, Yemen                              |
| <b>Chinese</b>   | 胰岛素, #胰岛素, 糖尿病, #糖尿病, 糖尿病, #糖尿病患者, 血糖, #血糖, #2型糖尿病, #1型糖尿病                                                                                                                                                                                                                | China, Singapore, Taiwan (Republic of China)                                                                                                                                                                                                                       |
| <b>Danish</b>    | diabetiske, #diabetiske                                                                                                                                                                                                                                                   | Denmark                                                                                                                                                                                                                                                            |
| <b>Dutch</b>     | #suikerziekte, bloed glucose, #bloedglucose, #diabetestype1, #diabetestype2                                                                                                                                                                                               | Aruba, Belgium, Curacao, The Netherlands, Sint Maarten, Suriname                                                                                                                                                                                                   |
| <b>English</b>   | insulin, #insulin, diabetes, #diabetes, diabetic, #diabetic, #diabeticproblems, blood glucose, #bloodglucose, blood sugar, #bloodsugar, #diabeticstruggles, #lifewithdiabetes, #type1diabetes, #type2diabetes, #insulin4all, #thisisdiabetes, #stopdiabetes, #fingerprick | Antigua and Barbuda, Australia, The Bahamas, Barbados, Belize, Canada, Dominica, Grenada, Guyana, Ireland, Jamaica, Malta, New Zealand, St Kitts and Nevis, St Lucia, St Vincent and the Grenadines, Trinidad and Tobago, United Kingdom, United States of America |
| <b>Filipino</b>  | Diyabetis, #diyabetis, #dyabetiko, Dugo glucose, #asukalsadugo, problema sa diabetes                                                                                                                                                                                      | Philippines                                                                                                                                                                                                                                                        |

|                   |                                                                                                                                                                                                                              |                                                                                                                                                                |
|-------------------|------------------------------------------------------------------------------------------------------------------------------------------------------------------------------------------------------------------------------|----------------------------------------------------------------------------------------------------------------------------------------------------------------|
| <b>French</b>     | insuline, #insuline, Diabète, #Diabète, diabétique, #diabétique, #problèmedediabétique, glucose sanguin, #glucosesanguin, #maviedediabétique, #diabètetype1, #diabète de type 2, #diabètedetype1, #diabetetype2, #mondiabete | France, Canada, Belgium, Switzerland, Congo-Kinshasa, Congo-Brazzaville, Côte d'Ivoire, Madagascar, Cameroon, Burkina Faso, Niger, Mali, Senegal, Haiti, Benin |
| <b>German</b>     | Diabetiker, #Diabetiker, #diabetikerproblem, Blutzucker, #blutzucker, #meindiabetes, #Diabetikerleben, #diabetestyp1, #Typ1Diabetes, #diabetestyp2, #Typ2Diabetes                                                            | Germany, Belgium, Austria, Switzerland, Luxembourg, Liechtenstein                                                                                              |
| <b>Greek</b>      | ινσουλίνη, #ινσουλίνη, Διαβήτης, #Διαβήτης, διαβητικός, #διαβητικός, γλυκόζη αίματος, #γλυκόζηστοαίμα, ζωή με διαβήτη, #διαβήτητύπου1, #διαβήτη τύπου 2                                                                      | Greece, Cyprus                                                                                                                                                 |
| <b>Hausa</b>      | ciwon diabet, #ciwonsukari, jini glucose, #jini glucose                                                                                                                                                                      | Nigeria, Niger, Cameroon, Chad, Sudan                                                                                                                          |
| <b>Hindi</b>      | इंसुलिन, #इंसुलिन, मधुमेह, #मधुमेह, मधुमेह की समस्या, रक्त द्राक्ष - शर्करा, मधुमेह के संघर्ष, के साथ जीवन मधुमेह, टाइप 1 मधुमेह, टाइप 2 मधुमेह, madhumeh                                                                    | India                                                                                                                                                          |
| <b>Indonesian</b> | gula darah, #guladarah, perjuangan diabetes, hidup dengan diabetes, diabetes tipe 1, #diabetestipe1, diabetes tipe 2, #diabetestipe2                                                                                         | Indonesia                                                                                                                                                      |
| <b>Italian</b>    | glucosio nel sangue, #glucosionelsangue, diabete di tipo 1, #diabeditipo1, diabete di tipo 2, #diabeditipo2                                                                                                                  | Italy, San Marino, Switzerland, Vatican City                                                                                                                   |
| <b>Japanese</b>   | インスリン, #インシュリン, 糖尿病, #糖尿病, 糖尿病, #糖尿病の, 糖尿病の問題, 血糖, #血糖, 1型糖尿病, #1型糖尿病, 2型糖尿病, #2型糖尿病, #私の糖尿病                                                                                                                                 | Japan                                                                                                                                                          |

|                   |                                                                                                                                                                                       |                                                                                                                                                                                                    |
|-------------------|---------------------------------------------------------------------------------------------------------------------------------------------------------------------------------------|----------------------------------------------------------------------------------------------------------------------------------------------------------------------------------------------------|
| <b>Korean</b>     | 인슐린, #인슐린당뇨병, #당뇨병, 당뇨병 환자, #당뇨병 환자, 혈당, #혈당, 당뇨병 투쟁, 제 1 형 당뇨병, 제 2 형 당뇨병                                                                                                            | Korea                                                                                                                                                                                              |
| <b>Malay</b>      | pesakit kencing manis, #pesakitkencingmanis, glukosa darah, #glukosadarah, diabetes jenis 1, diabetes jenis 2                                                                         | Malaysia, Brunei, Indonesia, Singapore, The Philippines, Thailand                                                                                                                                  |
| <b>Norwegian</b>  | blodsukker, #blodsukker, #mind diabetes                                                                                                                                               | Norway                                                                                                                                                                                             |
| <b>Polish</b>     | cukrzyca, #cukrzyca, cukrzycowy, #cukrzycowy, glukoza we krwi, #glukozawekrwi, #cukrzycatypu1, #cukrzycatypu2, #mojacukrzyca, życie z cukrzycą                                        | Poland                                                                                                                                                                                             |
| <b>Portuguese</b> | #problemasdiabéticos, glicose no sangue, #glicosenosangue, #vidacomdiabetes                                                                                                           | Brazil, Mozambique, Angola, Portugal, Guinea-Bissau, East Timor, Equatorial Guinea, Cape Verde, São Tomé and Príncipe                                                                              |
| <b>Romanian</b>   | insulină, #insulinăDiabet, #Diabet, glucoza din sange, #glucozadinsange, diabet de tip 1, diabet de tip 2                                                                             | Romania, Republic of Moldova                                                                                                                                                                       |
| <b>Russian</b>    | инсулин, #инсулин, сахарный диабет, #сахарный диабет, диабетом, #диабетический, содержание глюкозы в крови, #жизньсдиабетом, диабет 1 типа, #диабет1типа, диабет 2 типа, #диабет2типа | Russia, Belarus, Kyrgyzstan, Kazakhstan                                                                                                                                                            |
| <b>Spanish</b>    | insulina, #insulina, diabético, #diabético, #problemas de la diabetes, glucosa en sangre, #glucosaenlasangre, #Diabetestipo1, #Diabetestipo2, #detenerladiabetes, #esto esdiabetes    | Argentina, Bolivia, Chile, Colombia, Costa Rica, Cuba, Dominican Republic, Ecuador, El Salvador, Equatorial Guinea, Guatemala, Honduras, Mexico, Nicaragua, Panama, Paraguay, Peru, Spain, Uruguay |
| <b>Swahili</b>    | Insulini, #insulini, Kisukari, #kisukari, Glucose ya damu, kisukari type 1, kisukari type 2                                                                                           | Tanzania, Kenya, Uganda, The Democratic Republic of Congo, the Comoros Islands                                                                                                                     |
| <b>Swedish</b>    | blodsocker, #blodsocker, #typ1diabetes, #typ2diabetes                                                                                                                                 | Sweden                                                                                                                                                                                             |

|                   |                                                                                                                                                                                                                  |                                                                                                                                                                                                          |
|-------------------|------------------------------------------------------------------------------------------------------------------------------------------------------------------------------------------------------------------|----------------------------------------------------------------------------------------------------------------------------------------------------------------------------------------------------------|
| <b>Thai</b>       | กลูโคส, #กลูโคส, อินซูลิน, #อินซูลิน, โรคเบาหวาน, #โรคเบาหวาน, การต่อสู้กับโรคเบาหวาน, ระดับน้ำตาลในเลือด, #ระดับน้ำตาลในเลือด, การต่อสู้กับโรคเบาหวาน, โรคเบาหวานประเภท 1, โรคเบาหวานประเภท 2, โรคเบาหวานของฉับ | Thailand, Vietnam, Laos                                                                                                                                                                                  |
| <b>Turkish</b>    | ensülin, #ensülin, şeker hastalığı, #şeker hastalığı, şeker hastası, #şekerhastası, kan şekeri, #kan şekeri, tip 1 diyabet, #tip1diyabet, tip 2 diyabet, #tip2diyabet                                            | Albania, Azerbaijan, Bosnia and Herzegovina, Bulgaria, Greece, Northern Cyprus, Kosovo, the Republic of Macedonia, Moldova, Montenegro, Romania, Russia, Serbia, Syria, Turkey, Turkmenistan, Uzbekistan |
| <b>Urdu</b>       | انسولين, #انسولين, ذیابیطس, #ذیابیطس, خون میں گلوکوز, #خون میں گلوکوز, ٹائپ 1 ذیابیطس, ٹائپ 2 ذیابیطس.                                                                                                           | Pakistan, India, Afghanistan, Saudi Arabia                                                                                                                                                               |
| <b>Vietnamese</b> | Bệnh tiểu đường, #Bệnhtiểuđường, Bệnh tiểu đường., #mácbệnhđáidường, đường huyết, #đường huyết, bệnh tiểu đường loại 1, bệnh tiểu đường loại 2                                                                   | Vietnam                                                                                                                                                                                                  |
